# Supplementary material for: Preparation, characterization and application of CS@PDA@Fe3O4 nanocomposite as a new magnetic nano-adsorber for the removal of metals and dyes in wastewater
Source: Royal Society of Chemistry journal article supplement (doi:10.1039/d1ra03779j), 2021-01-01
Supplement: d1ra03779j1.pdf [file d1ra03779j1.pdf]

Supplementary Information

Preparation, characterization and application of CS@PDA@Fe<sub>3</sub>O<sub>4</sub> nanocomposite as a new magnetic nano-adsorber for the removal of metals and dyes in wastewater

Authors: Xingjing Zhang, Baohe Li, Xiaoqian Han\* and Nong Wang

School of Chemical and Biological Engineering, Lanzhou Jiaotong University, Lanzhou, Gansu 730000, P.R.China

1. Characterization of CS@PDA@Fe<sub>3</sub>O<sub>4</sub> biopolymer adsorbent
  - a. FT-IR
  - b. Saturation magnetization
  - c. X-ray spectra
  - d-g. SEM and TEM
2. Table of compositions of Fe<sub>3</sub>O<sub>4</sub>, PDA@Fe<sub>3</sub>O<sub>4</sub> and CS@PDA@Fe<sub>3</sub>O<sub>4</sub>
3. XPS spectra

# 1. Characterization of CS@PDA@Fe<sub>3</sub>O<sub>4</sub> biopolymer adsorbent

## 1-1a FT-IR

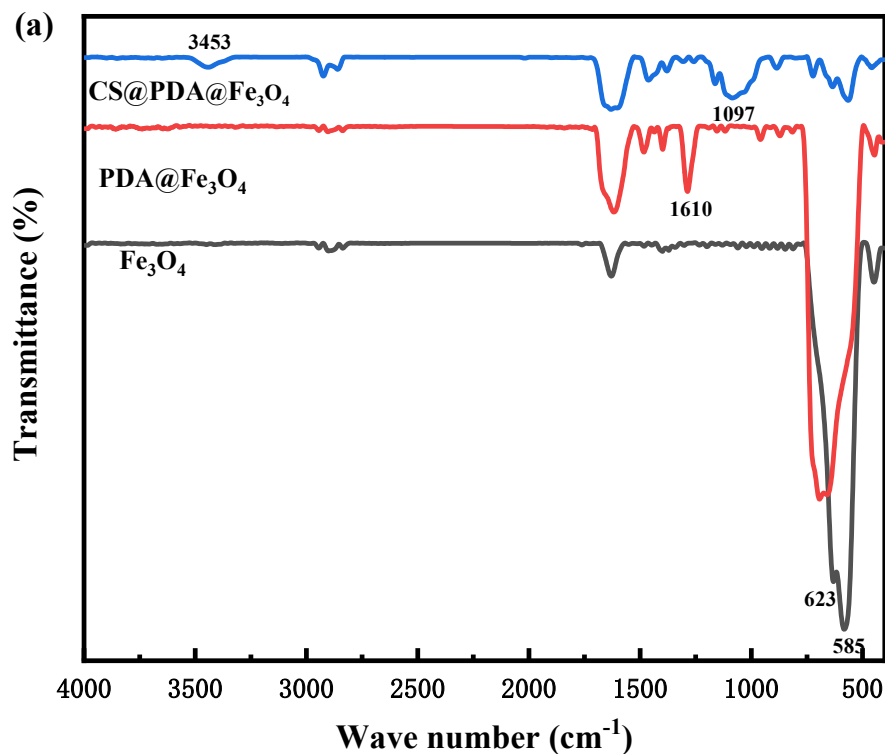

Figure S 1 FT-IR of Fe<sub>3</sub>O<sub>4</sub> PDA@Fe<sub>3</sub>O<sub>4</sub> and CS@PDA@Fe<sub>3</sub>O<sub>4</sub>

## 1-1b Saturation magnetization

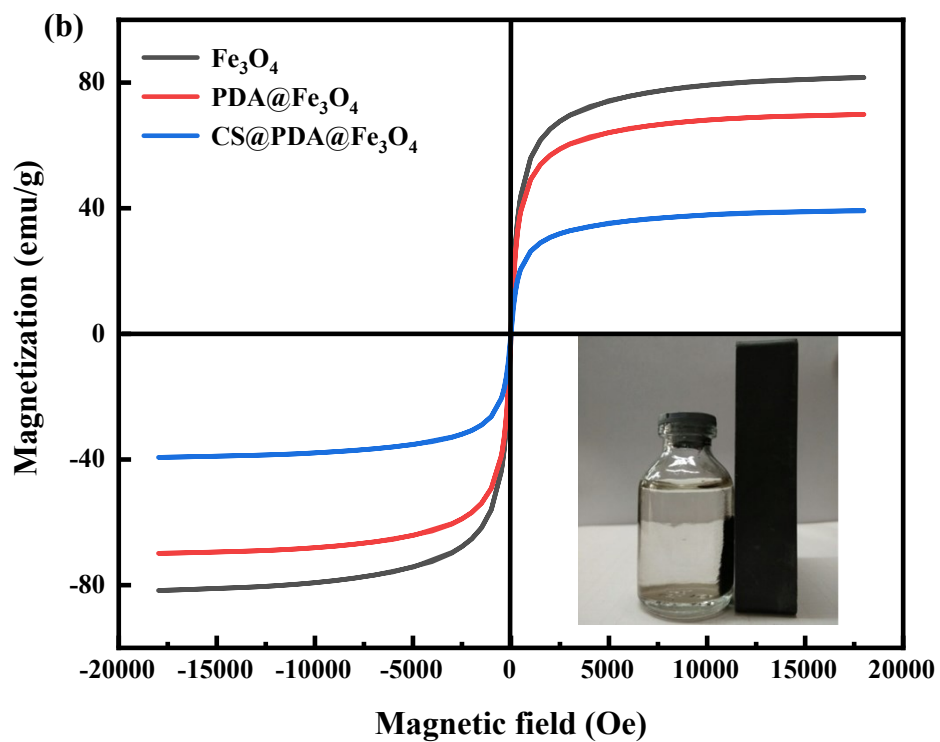

Figure S 2 Saturation magnetization of Fe<sub>3</sub>O<sub>4</sub> PDA@Fe<sub>3</sub>O<sub>4</sub> and CS@PDA@Fe<sub>3</sub>O<sub>4</sub>

1-1c X-ray spectra

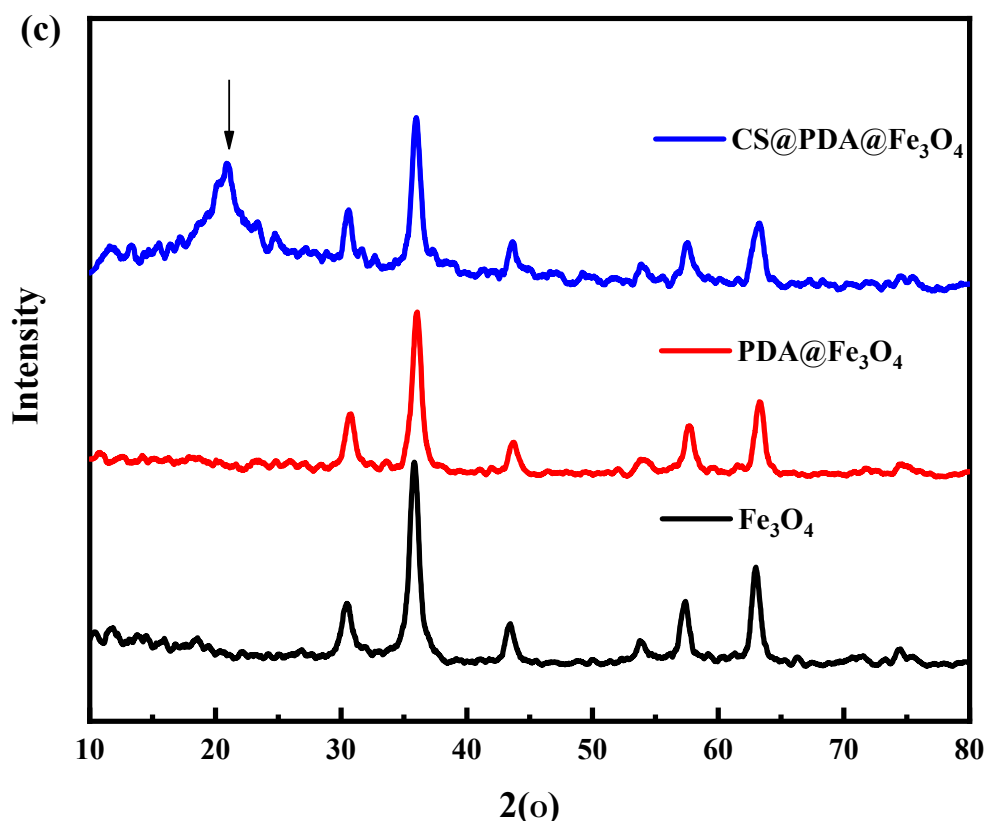

Figure S 3 X-ray of Fe<sub>3</sub>O<sub>4</sub> PDA@Fe<sub>3</sub>O<sub>4</sub> and CS@PDA@Fe<sub>3</sub>O<sub>4</sub>

1-1d-g SEM and TEM

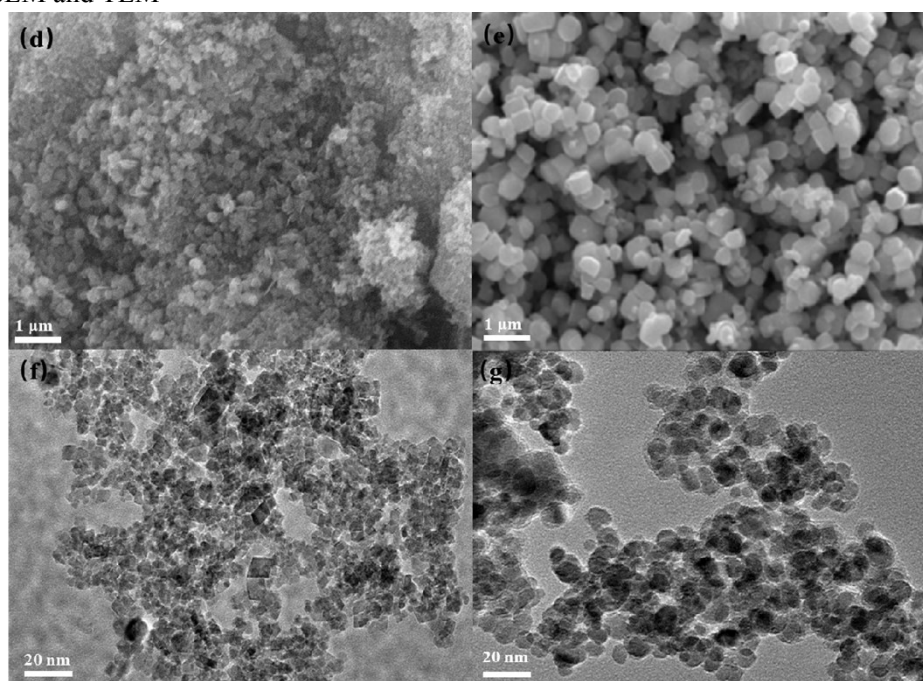

Figure S 4 SEM images of Fe<sub>3</sub>O<sub>4</sub>, (e) SEM images of CS@PDA@Fe<sub>3</sub>O<sub>4</sub>; (f) TEM image of Fe<sub>3</sub>O<sub>4</sub>, (g) TEM image of CS@PDA@Fe<sub>3</sub>O<sub>4</sub>.

## 2. EDS of CS@PDA@Fe<sub>3</sub>O<sub>4</sub>

Table S 1. Compositions of Fe<sub>3</sub>O<sub>4</sub>, PDA@Fe<sub>3</sub>O<sub>4</sub> and CS@PDA@Fe<sub>3</sub>O<sub>4</sub>

| Sample name                            | Fe (%) | O (%) | C (%) | N (%) | Si (%) |
|----------------------------------------|--------|-------|-------|-------|--------|
| Fe <sub>3</sub> O <sub>4</sub>         | 64.75  | 35.25 | —     | —     | —      |
| Fe <sub>3</sub> O <sub>4</sub> @PDA    | 25.50  | 41.44 | 29.40 | 3.66  | —      |
| Fe <sub>3</sub> O <sub>4</sub> @PDA@CS | 2.74   | 39.40 | 48.49 | 8.99  | 0.99   |

## 3. XPS spectra

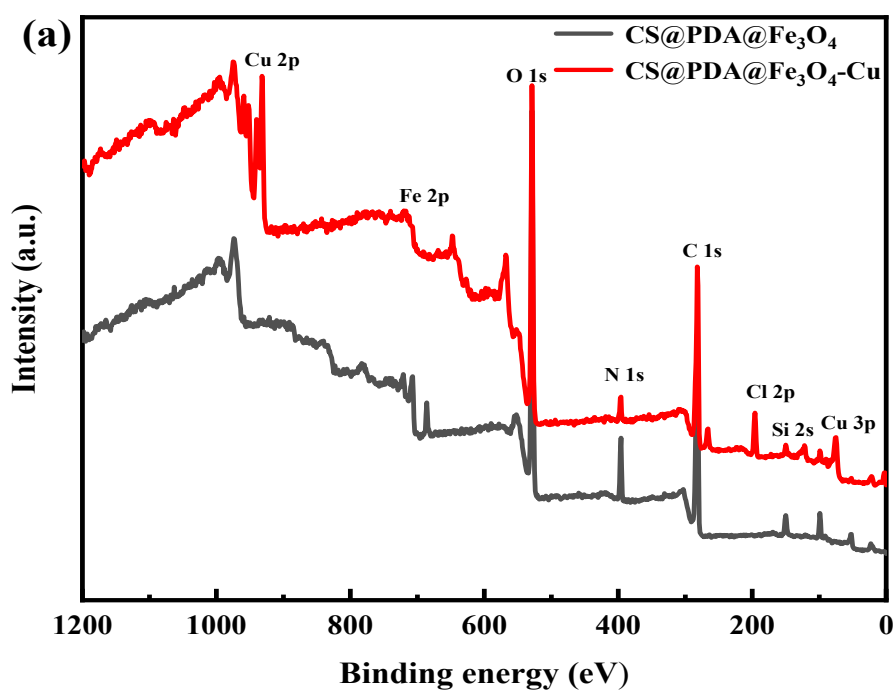

Figure S 5 XPS spectra of (a) wide scan of the virgin and Cu (II)-loaded CS@PDA@Fe<sub>3</sub>O<sub>4</sub>

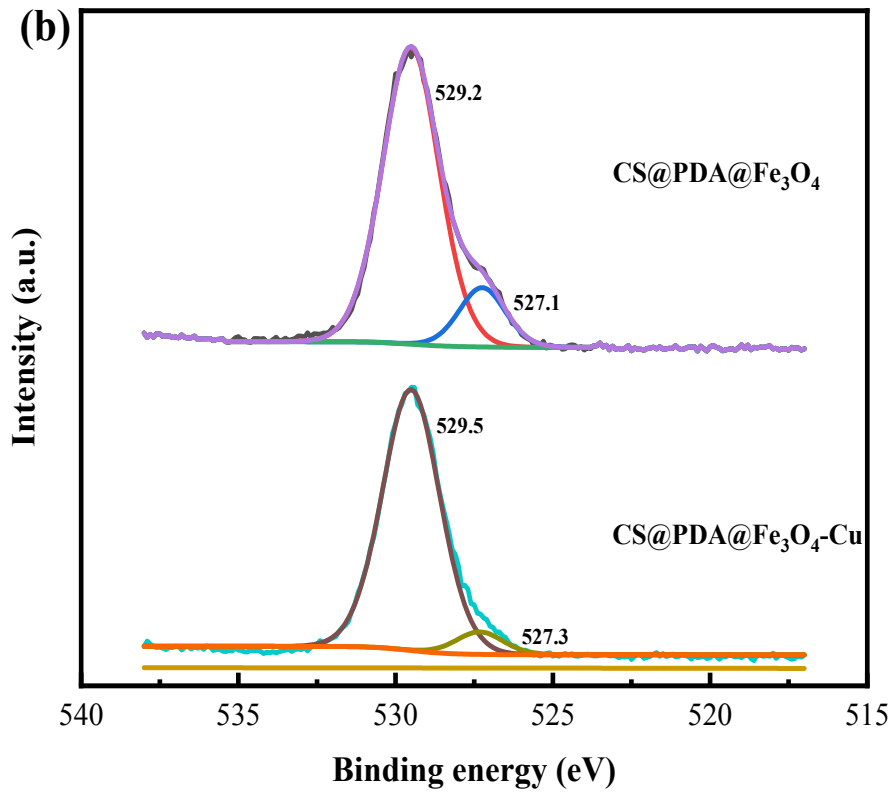

Figure S 6 XPS spectra of N 1s of the virgin and Cu (II)-loaded CS@PDA@Fe<sub>3</sub>O<sub>4</sub>

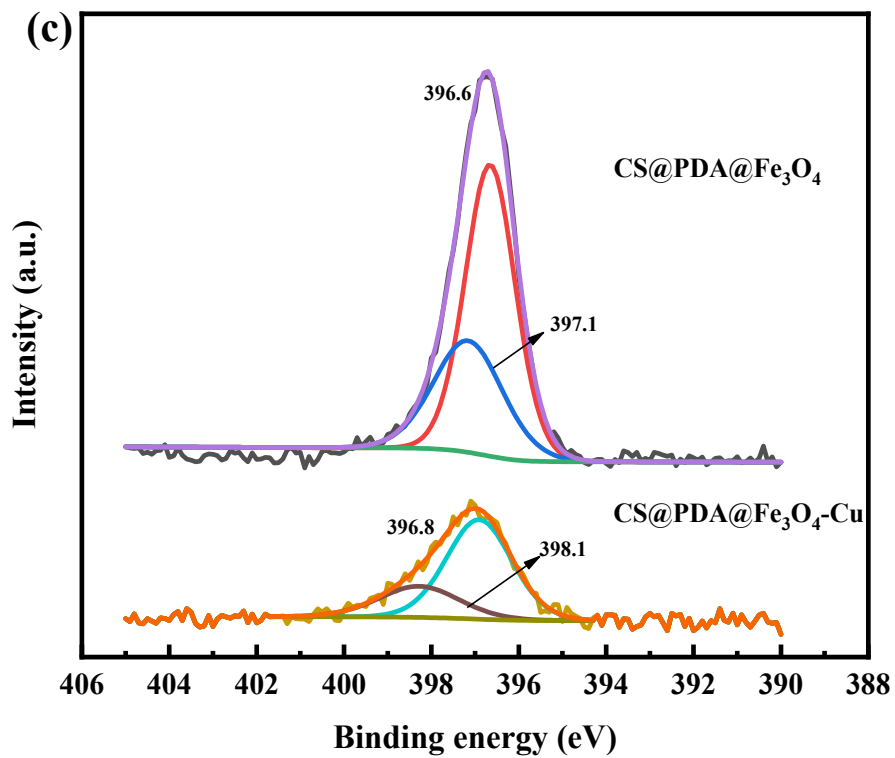

Figure S 7 O 1s of the virgin and Cu (II)-loaded CS@PDA@Fe<sub>3</sub>O<sub>4</sub>
